# Supplementary material for: Long-Term Outcomes and Cost-Effectiveness of an Internet-Based Self-Help Intervention for Social Anxiety Disorder in University Students: Results of a Randomized Controlled Trial
Source: Hindawi journal article supplement (doi:10.1155/2023/7912017), 2023-11-17
Supplement: f1 [file 7912017.f1.pdf]

## Supplementary material

**Table S1** Unit costs for the type of health service utilized by the participants

| Health service type                                | Unit          | Costs (€) <sup>a</sup> |
|----------------------------------------------------|---------------|------------------------|
| Physician                                          | Contact       | 21.53                  |
| Orthopedist                                        |               | 26.71                  |
| Specialists for internal medicine                  |               | 66.47                  |
| Dermatologist                                      |               | 20.26                  |
| Urologist                                          |               | 26.07                  |
| ENT specialist                                     |               | 29.09                  |
| Neurologist                                        |               | 48.64                  |
| Psychotherapist                                    |               | 82.17                  |
| Logopedics / speech therapy                        | Contact       | 40.56                  |
| Physiotherapy                                      |               | 17.30                  |
| Ergotherapy / occupational therapy                 |               | 39.01                  |
| Mean remedies                                      |               | 32.29                  |
| General hospital / inpatient                       | Day           | 648.11                 |
| Mental hospital / inpatient                        |               | 348.26                 |
| General hospital / day patient                     |               | 421.27                 |
| Mental hospital / day patient                      |               | 226.37                 |
| Rehabilitation /outpatient                         | Day           | 49.43                  |
| Rehabilitation /day patient                        |               | 93.81                  |
| Rehabilitation /inpatient                          |               | 138.19                 |
| University counselling center                      | Contact       | 48.40                  |
| <b>Patient and family costs</b>                    | <b>Unit</b>   | <b>Costs (€)</b>       |
| Costs for travel <sup>b</sup>                      | Per kilometer | €0.30 (US\$0.40)       |
| Opportunity costs <sup>c</sup>                     | Per hour      | €22.85 (US\$30.30)     |
| Informal Care from friends and family <sup>d</sup> | Per hour      | €19.63 (US\$25.67)     |

<sup>a</sup> Unit costs were calculated or adjusted by the German consumer price index<sup>89</sup> for the year 2017

<sup>b</sup> Schmidt, L. Einkommenssteuergesetzbuch (EStG) [German Income Tax Code] (2017)

<sup>c</sup> Bock, J.-O. et al. Standardisierte Bewertungssätze aus gesellschaftlicher Perspektive für die gesundheitsökonomische Evaluation. 55 (Nomos Verlagsgesellschaft mbH & Co. KG, 2015)

<sup>d</sup> Bock, J.-O. et al. Ermittlung standardisierter Bewertungssätze aus gesellschaftlicher Perspektive für die gesundheitsökonomische Evaluation. [Calculation of Standardised Unit Costs from a Societal Perspective for Health Economic Evaluation] *Das Gesundheitswes.* 77, 53–61 (2014)

**Table S2** Baseline sample characteristics

| Characteristics                         | All participants<br>( <i>N</i> = 200) | IG ( <i>n</i> = 100) | WLC ( <i>n</i> = 100) |
|-----------------------------------------|---------------------------------------|----------------------|-----------------------|
|                                         | N (%)                                 | N (%)                | N (%)                 |
| <b>Sociodemographic characteristics</b> |                                       |                      |                       |
| Age (M, SD)                             | 26.70 (6.34)                          | 26.71 (6.08)         | 26.68 (6.61)          |
| Sex, female                             | 124 (62%)                             | 63 (63%)             | 61 (61%)              |
| Married or in a relationship            | 102 (51.0%)                           | 52 (52.0%)           | 50 (50.0%)            |
| <b>Citizenship</b>                      |                                       |                      |                       |
| Germany                                 | 150 (75%)                             | 74 (74.0%)           | 76 (76.0%)            |
| Switzerland                             | 40 (20%)                              | 21 (21.0%)           | 19 (19.0%)            |
| EEA member                              | 3 (1.5%)                              | 1 (1.0%)             | 2 (2.0%)              |
| No EEA member                           | 7 (3.5 %)                             | 4 (4.0%)             | 3 (3.0%)              |
| <b>Study characteristics</b>            |                                       |                      |                       |
| Full-time student                       | 170 (85.0%)                           | 86 (86.0%)           | 84 (84.0%)            |
| Part-time student                       | 30 (15.0%)                            | 14 (14.0%)           | 16 (16.0%)            |
| Semester (M, SD)                        | 5.09 (3.38)                           | 4.65 (3.15)          | 5.53 (3.56)           |
| <b>Work characteristics</b>             |                                       |                      |                       |
| Employed                                | 106 (53.0%)                           | 58 (58.0%)           | 48 (48.0%)            |
| Full-time employed                      | 17 (8.5%)                             | 9 (9.0%)             | 8 (8.0%)              |
| <b>Chronic conditions</b>               |                                       |                      |                       |
| Any chronic condition                   | 127 (64%)                             | 66 (66%)             | 61 (61%)              |
| <b>Treatment utilization</b>            |                                       |                      |                       |
| Previous psychotherapy                  | 68 (34.0%)                            | 38 (38.0%)           | 30 (30.0%)            |
| Medication at T0                        | 5 (2.5%)                              | 3 (3.0%)             | 2 (2.0%)              |

*EEA* European Economic Area, *M* mean, *SD* standard deviation

**Table S3** Treatment response, symptom-free status, and symptom deterioration at 6-month follow-up

| Outcome                      | T2 <sup>a</sup>        |                         | $\chi^2(1)$ | <i>p</i> | NNT (95% CI)    |
|------------------------------|------------------------|-------------------------|-------------|----------|-----------------|
|                              | IG<br>(n=100)<br>N (%) | WLC<br>(n=100)<br>N (%) |             |          |                 |
| <b>Reliable improvement</b>  |                        |                         |             |          |                 |
| SPS                          | 77                     | 40                      | 28.20       | < .001   | 2.7 (2.0; 4.1)  |
| SIAS                         | 72                     | 28                      | 38.72       | < .001   | 2.3 (1.8; 3.2)  |
| <b>Symptom-free status</b>   |                        |                         |             |          |                 |
| SPS                          | 49                     | 21                      | 17.23       | < .001   | 3.6 (2.5; 6.5)  |
| SIAS                         | 32                     | 11                      | 13.06       | < .001   | 4.8 (3.1; 10.0) |
| <b>Symptom deterioration</b> |                        |                         |             |          |                 |
| SPS                          | 3                      | 26                      | 21.33       | < .001   | -               |
| SIAS                         | 5                      | 29                      | 20.41       | < .001   | -               |

<sup>a</sup> Missing data imputed by multiple imputation

*CI* confidence interval,  $\chi^2$  chi square test, *IG* intervention group, *NNT* Number Needed to Treat, *WLC* waitlist control group
